# Supplementary material
Source: publisher figshare collection journal article supplement (https://frontiersin.figshare.com/ndownloader/files/20273523)
Supplement: Supplementary file [file 20273523]

## Supplementary Material

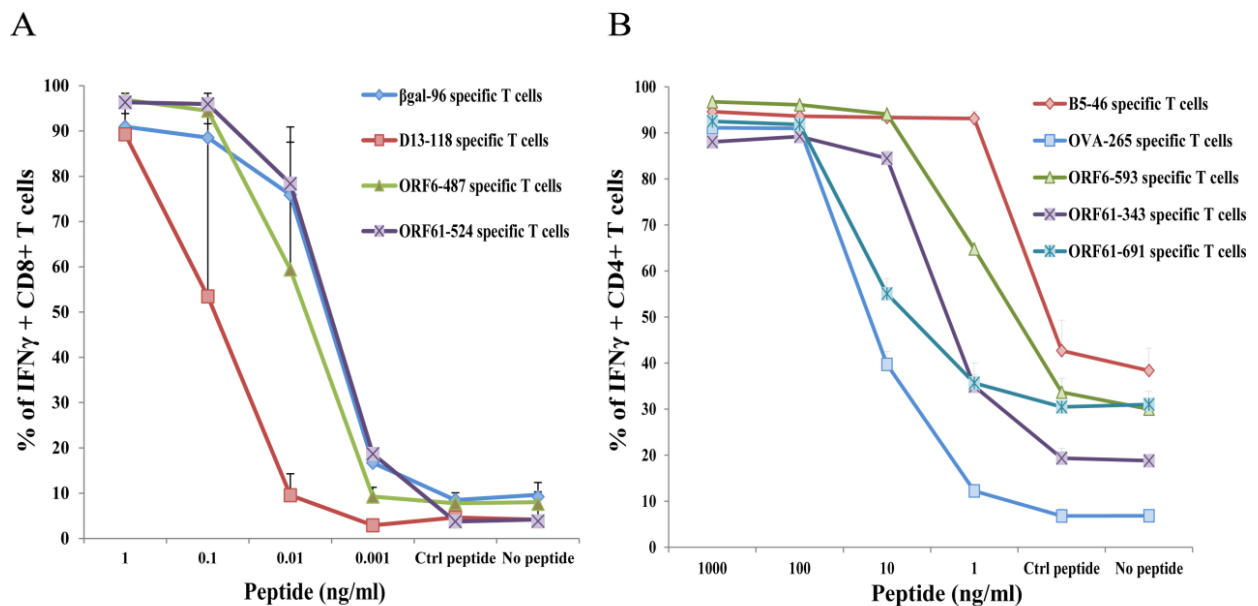

**Supplementary Figure 2.** Avidity of MHV-68 antigen-specific CD8+ and CD4+ T cell lines. **(A)** Avidity of CD8+ T cell lines. DC2.4 cells were pulsed at different peptide concentrations ( $10^{-8}$  M (1ng/ml) to  $10^{-11}$  M (0.001ng/ml)). **(B)** Avidity of CD4+ T cell lines. BMDCs were pulsed at different peptide concentrations ( $10^{-5}$  M (1000ng/ml) to  $10^{-8}$  M (1ng/ml)). CD8+ or CD4+ T cells with indicated specificity were added to DC2.4 cells or BMDC's, respectively. Target cells were pulsed with either the cognate peptide at declining concentrations or an irrelevant but MHC-binding control peptide at highest concentration or no peptide. After 4h incubation, frequencies of IFN $\gamma$ -producing CD8+ **(A)** and CD4+ T cells **(B)** were determined by intracellular cytokine staining (ICS) followed by FACS analysis. Data are mean  $\pm$  SEM of two independent experiments).
